# Supplementary material for: Tailored upconversion emission of Eu3+in Sr2Ca(W,Mo)O6:Yb3+,Eu3+by a laser via an electronic polarization mechanism
Source: Royal Society of Chemistry journal article supplement (doi:10.1039/c5tc00340g), 2015-01-01
Supplement: c5tc00340g1.pdf [file c5tc00340g1.pdf]

## Supporting information

### **Tailored upconversion emission of $\text{Eu}^{3+}$ in $\text{Sr}_2\text{Ca}(\text{W},\text{Mo})\text{O}_6:\text{Yb}^{3+},\text{Eu}^{3+}$ by laser via electronic polarization mechanism**

Ye Li<sup>1</sup>, Tianhui Liu<sup>2</sup>, Shi Ye<sup>1,a)</sup>, Tengfei Deng<sup>1</sup>, Xiong Yi<sup>1</sup>, Qinyuan Zhang<sup>1</sup> and Xiping Jing<sup>2,a)</sup>

<sup>1</sup>*State Key Lab of Luminescent Materials and Devices, and Guangdong Provincial Key Laboratory of Fiber Laser Materials and Applied Techniques, South China University of Technology, Guangzhou 510641, China*

<sup>2</sup>*Beijing National Laboratory for Molecular Sciences, State Key Laboratory of Rare Earth Materials Chemistry and Applications, College of Chemistry and Molecular Engineering, Peking University, Beijing 100871, China*

---

a) Author to whom correspondence should be addressed; Email: [msyes@scut.edu.cn](mailto:msyes@scut.edu.cn),

[xpjing@pku.edu.cn](mailto:xpjing@pku.edu.cn)

To exclude the influence of  $\text{Mn}^{4+}$  ions introduced by  $\text{MoO}_3$  raw material as argued by Wai-Lun Chan et al. (J. Mater. Chem. C, 2015, 3,960–963),  $\text{SCEYW}_{0.5}\text{Mn}_{0.5}\text{O}$ ,  $\text{SCEYW}_{0.95}\text{Mn}_{0.05}\text{O}$  powders were synthesized following our previous experiments with addition of  $\text{MnO}_2$  (99.95%, Aladdin). XRD patterns in Fig.S1 reveal that the  $\text{SCEYW}_{0.95}\text{Mn}_{0.05}\text{O}$  sample is single phased while  $\text{SCEYW}_{0.5}\text{Mn}_{0.5}\text{O}$  sample has a few minor impurities.

Upconversion emission spectra of the samples were recorded upon the excitation of a 976 nm laser beam, which are shown in Fig.S2. Inserts are the photographs of the samples. It can be seen that it becomes dark with the introduction of  $\text{MnO}_2$ . The anomalous upconversion emission peak at  $\sim 690$  nm, does not appear for both  $\text{SCEYW}_{0.5}\text{Mn}_{0.5}\text{O}$  and  $\text{SCEYW}_{0.95}\text{Mn}_{0.05}\text{O}$  samples. It distinctly shows that the peak at  $\sim 690$  nm in the perovskite materials is not contributed by the  $\text{Mn}^{4+}$  ion, but ascribed to the  ${}^5\text{D}_0$ - ${}^7\text{F}_4$  transition of  $\text{Eu}^{3+}$  ions.

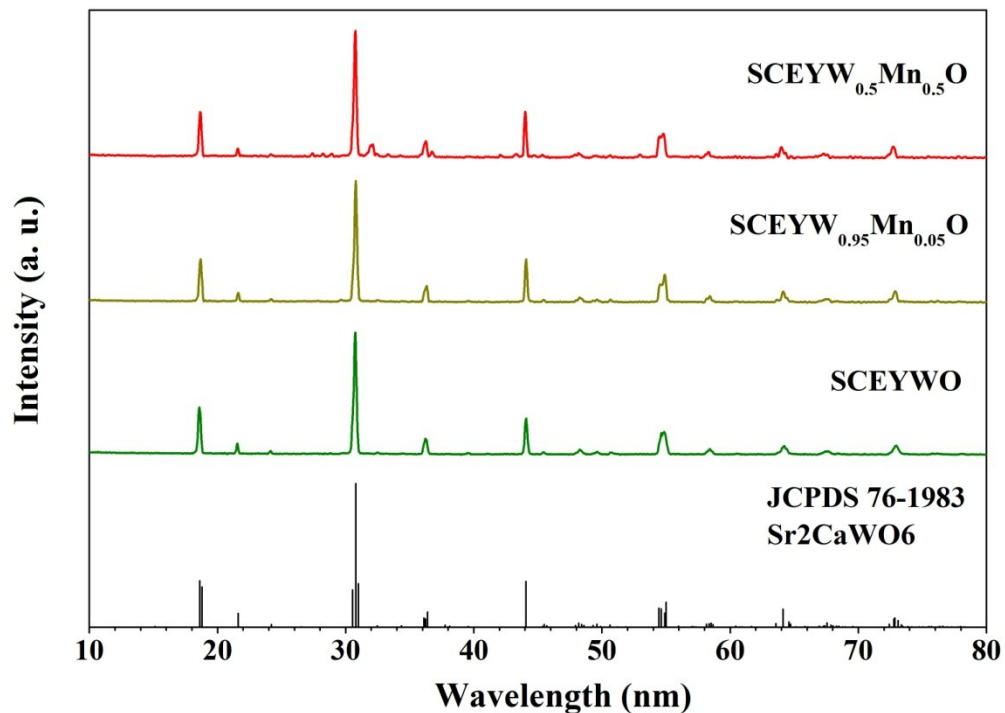

Fig. S1 XRD patterns of  $\text{SCEYW}_{0.5}\text{Mn}_{0.5}\text{O}$ ,  $\text{SCEYW}_{0.95}\text{Mn}_{0.05}\text{O}$  and  $\text{SCEYWO}$  powders. Standard diffraction pattern of  $\text{Sr}_2\text{CaWO}_6$  is included for comparison.

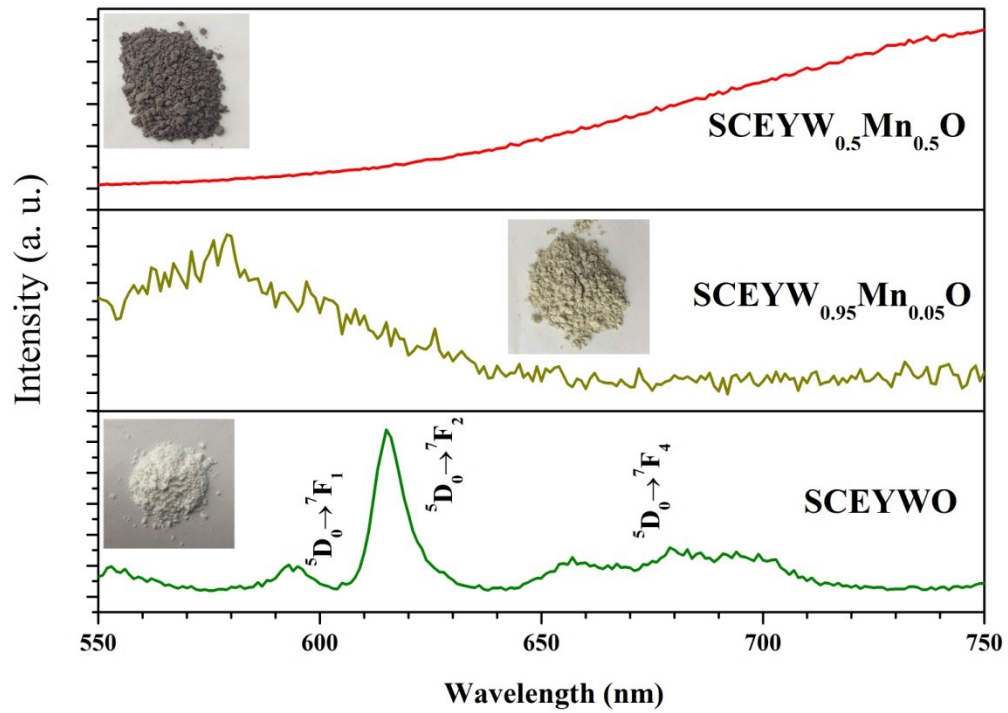

Fig. S2 Upconversion emission spectra of  $\text{SCEYW}_{0.5}\text{Mn}_{0.5}\text{O}$ ,  $\text{SCEYW}_{0.95}\text{Mn}_{0.05}\text{O}$  and  $\text{SCEYWO}$  (insert are photographs of the samples under sunlight) under the excitation of a 976 nm laser beam.
